# Supplementary material for: Prevalence and characteristics of fever in adult and paediatric patients with coronavirus disease 2019 (COVID-19): A systematic review and meta-analysis of 17515 patients
Source: PLOS journal article supplement (doi:10.1371/journal.pone.0249788), 2021-04-06
Supplement: S8 (10.1371/journal.pone.0249788.s008) [file journal.pone.0249788.s008]

**A**

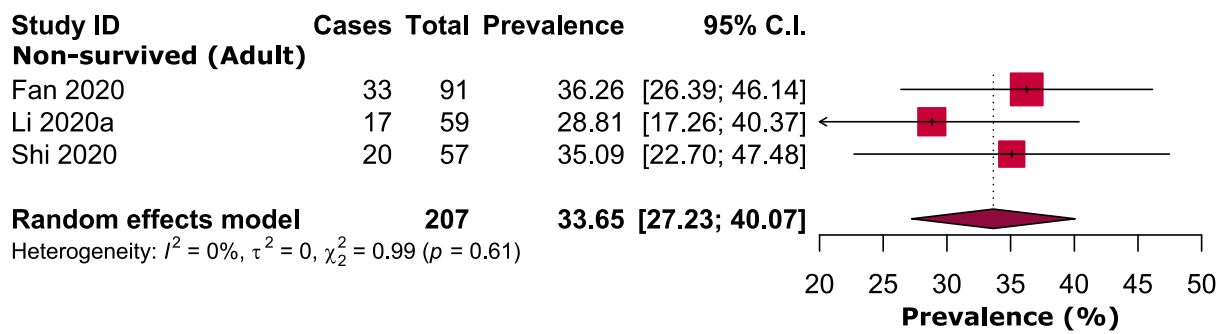

**B**

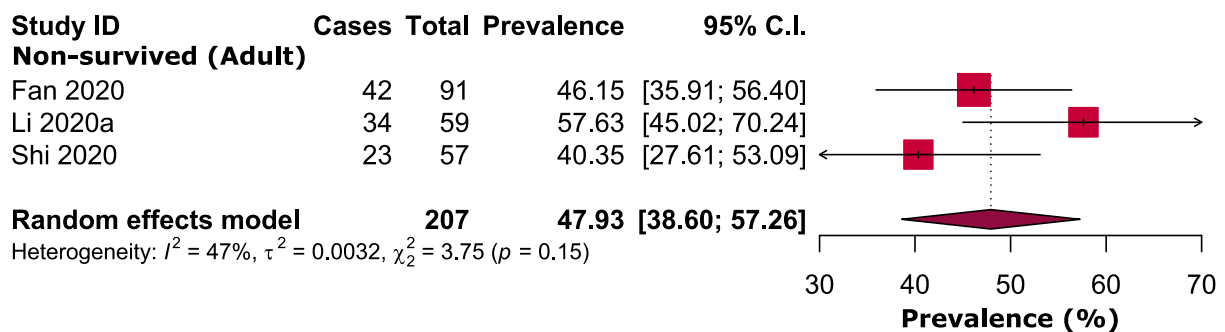

**C**

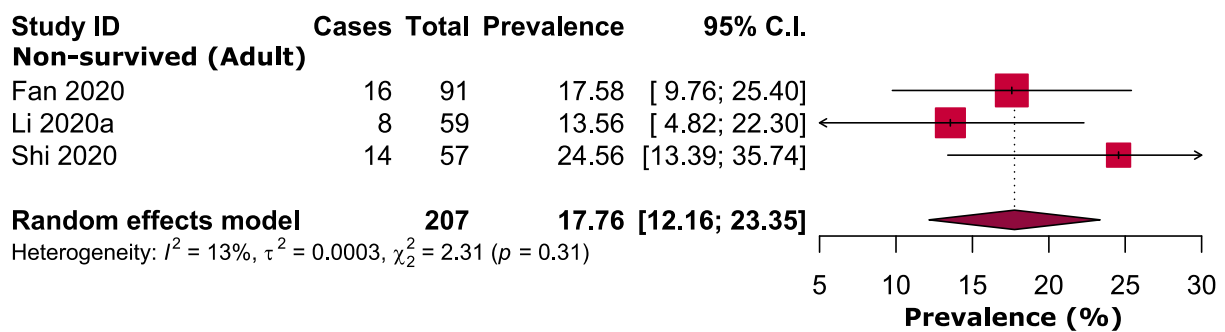

**S7 Fig. Prevalence of (A) low-grade (37.3-38.0°C), (B) medium-grade (38.1-39.0°C), and (C) high-grade fever (>39.0°C) in non-survived adult COVID-19 patients.**
