# Supplementary material for: Prevalence and characteristics of fever in adult and paediatric patients with coronavirus disease 2019 (COVID-19): A systematic review and meta-analysis of 17515 patients
Source: PLOS journal article supplement (doi:10.1371/journal.pone.0249788), 2021-04-06
Supplement: S15 (10.1371/journal.pone.0249788.s015) [file journal.pone.0249788.s015]

A

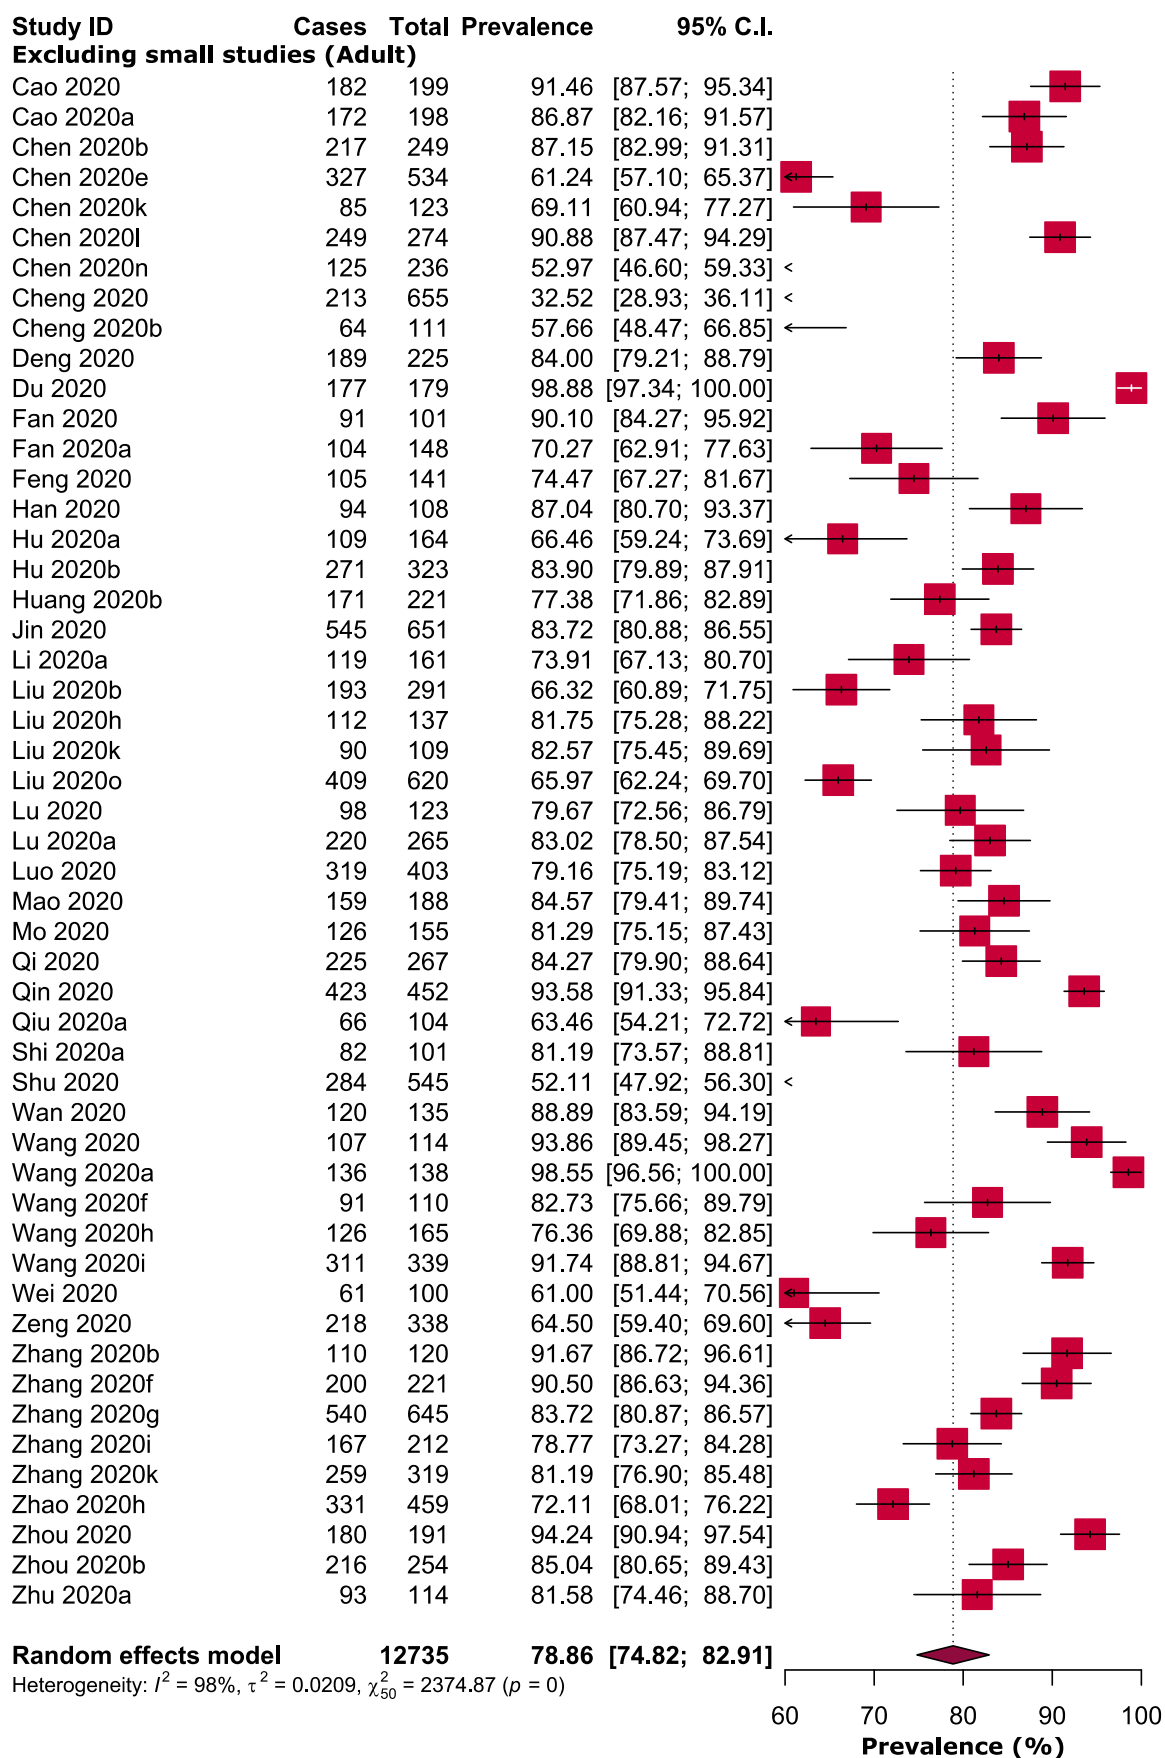

## B

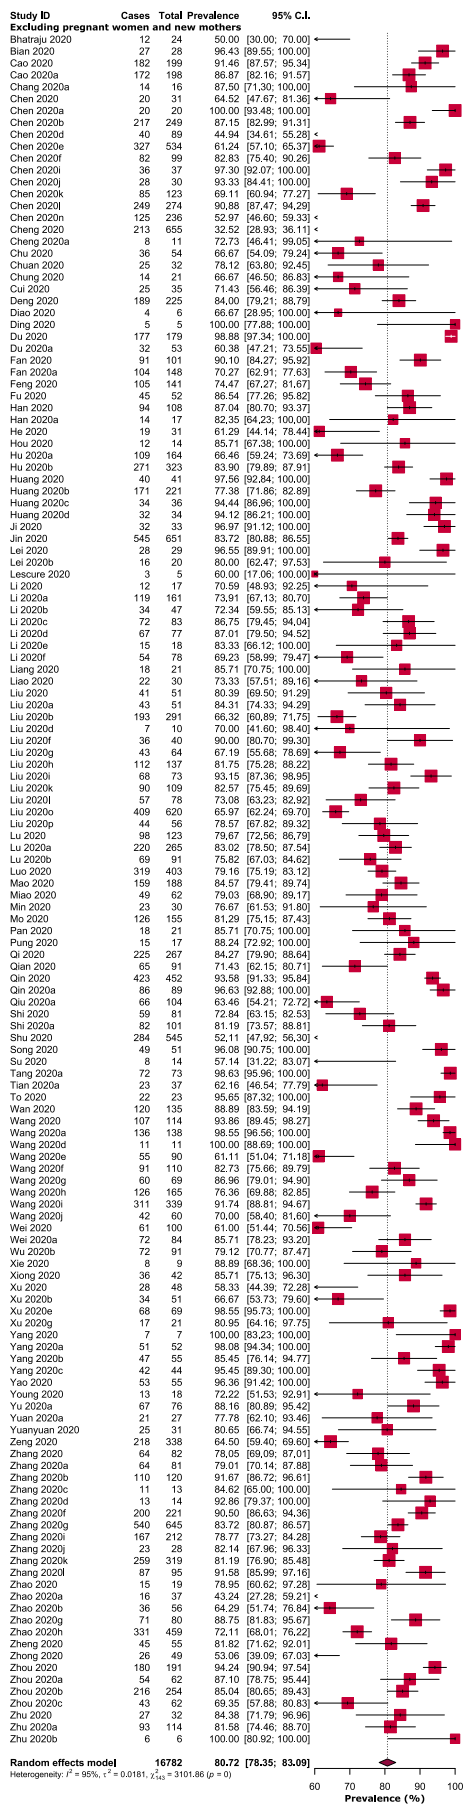

C

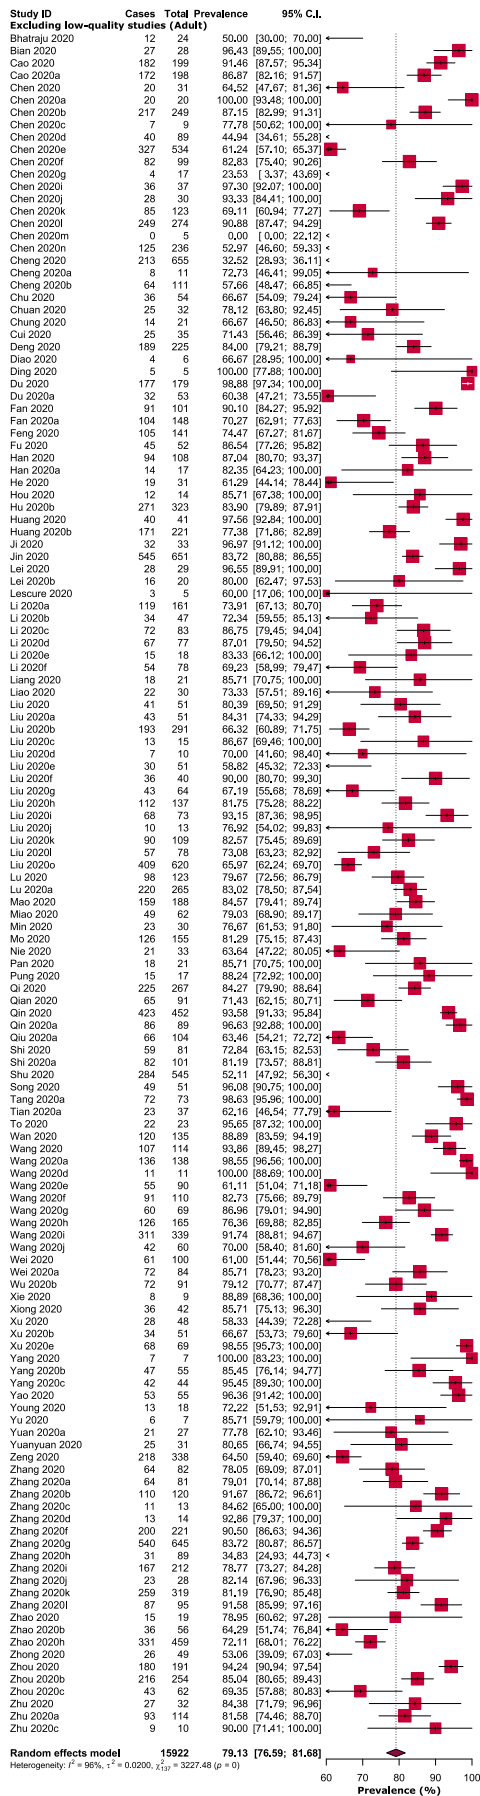

# D

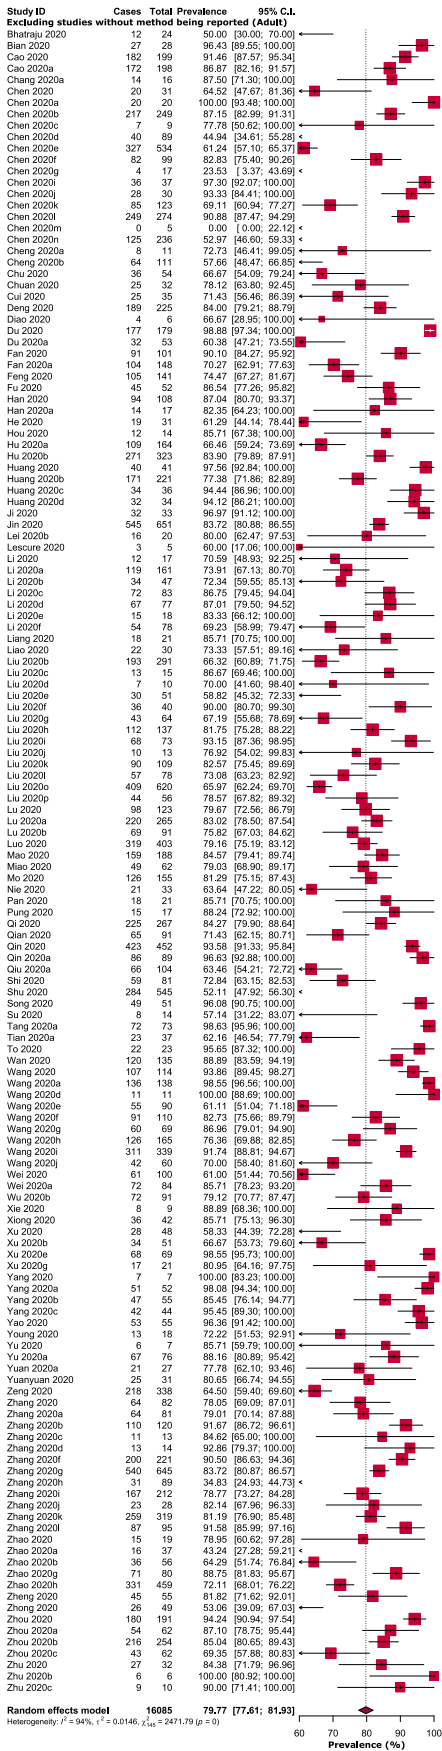

## E

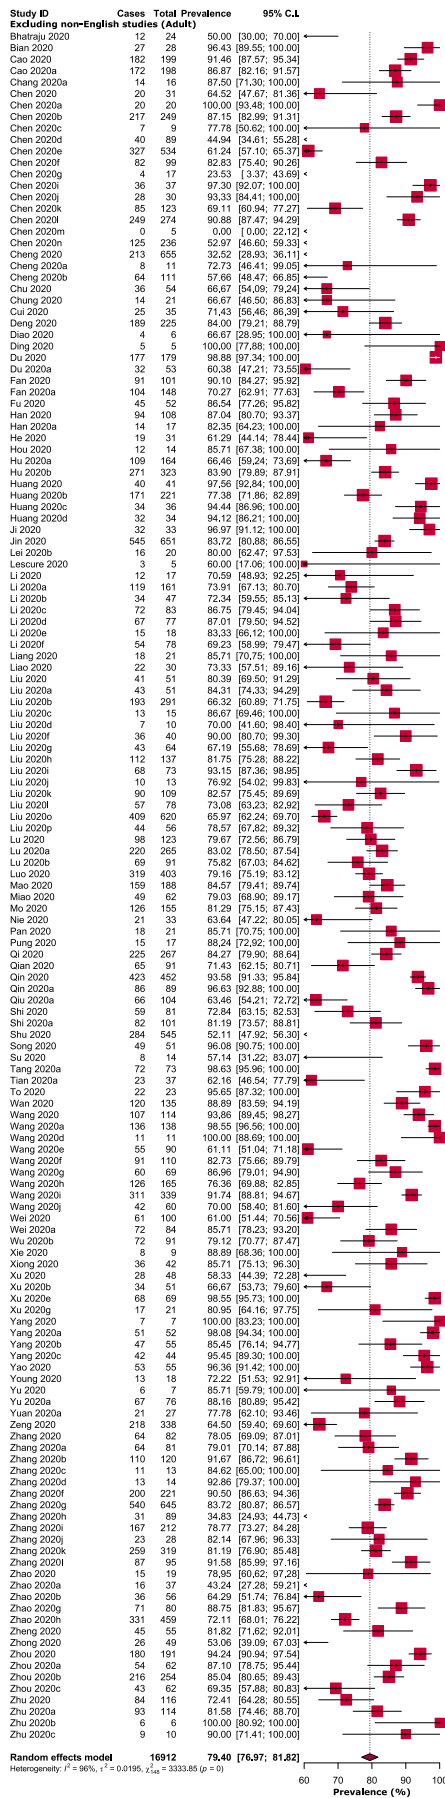

# F

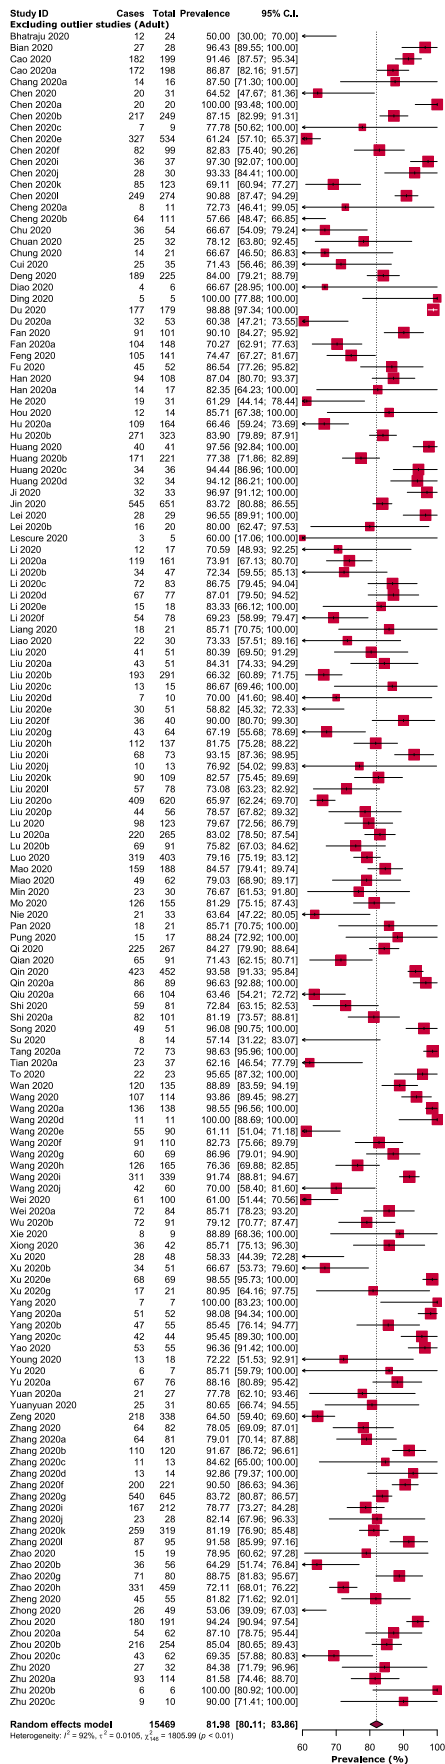

G

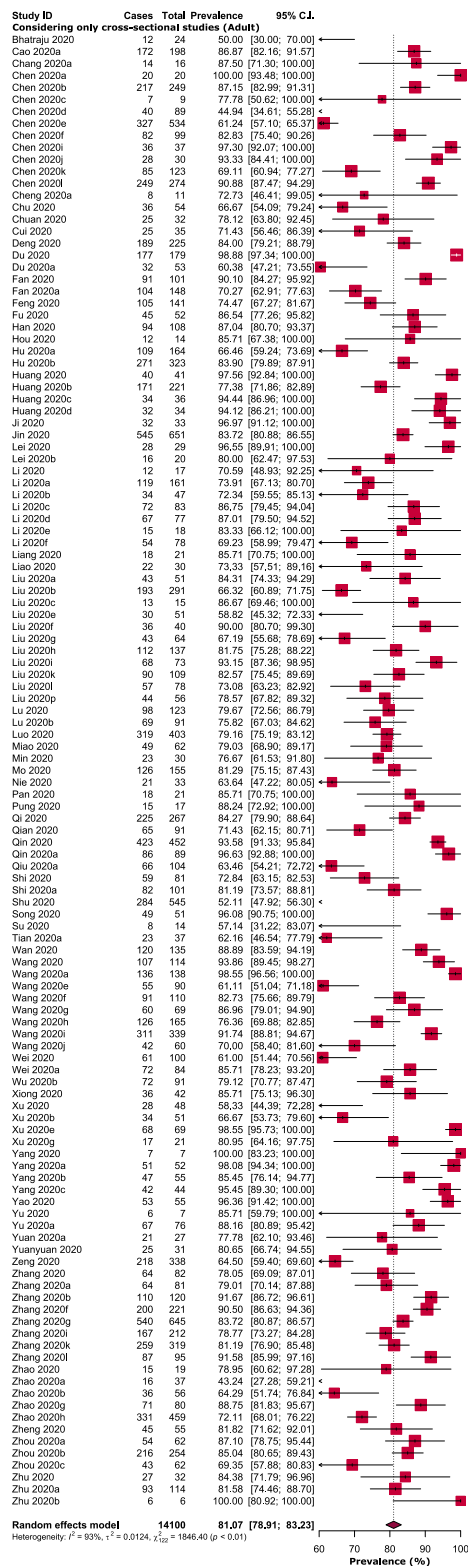

**S14 Fig. Sensitivity analyses: Prevalence of fever in adult COVID-19 patients (A) excluding small studies (n<100), (B) excluding pregnant women or new mothers, (C) excluding low-quality studies, (D) excluding studies without confirmation method being reported, (E) excluding non-English studies, (F) excluding outlier studies, and (G) considering only cross-sectional studies.**
